# Supplementary material for: Oxidative stress induced by Cu nutritional disorders in Citrus depends on nitrogen and calcium availability
Source: PubMed Central journal article supplement (PMC5786063; doi:10.1038/s41598-018-19735-x), 2018-01-26
Supplement: 41598_2018_19735_MOESM1_ESM.pdf [file 41598_2018_19735_MOESM1_ESM.pdf]

## **Oxidative stress induced by Cu nutritional disorders in *Citrus* depends on nitrogen and calcium availability**

Franz Walter Rieger Hippler<sup>1</sup>, Rodrigo Marcelli Boaretto<sup>1</sup>, Veronica Lorena DAVIS<sup>1</sup>, José Antônio Quaggio<sup>2</sup>, Ricardo Antunes Azevedo<sup>3</sup>, Dirceu Mattos-Jr.<sup>1</sup>

<sup>1</sup>Centro de Citricultura Sylvio Moreira, Instituto Agronômico, Rod. Anhanguera, km 158, CP 04, CEP 13490-970, Cordeirópolis, SP, Brazil

<sup>2</sup>Centro de Solos e Recursos Ambientais, Instituto Agronômico, Av. Barão de Itapura, 1481, CP 28, CEP 13020-902, Campinas, SP, Brazil

<sup>3</sup>Departamento de Genética, Escola Superior de Agricultura Luiz de Queiroz, CP 9, Universidade de São Paulo, 13418-900, Piracicaba, SP, Brazil

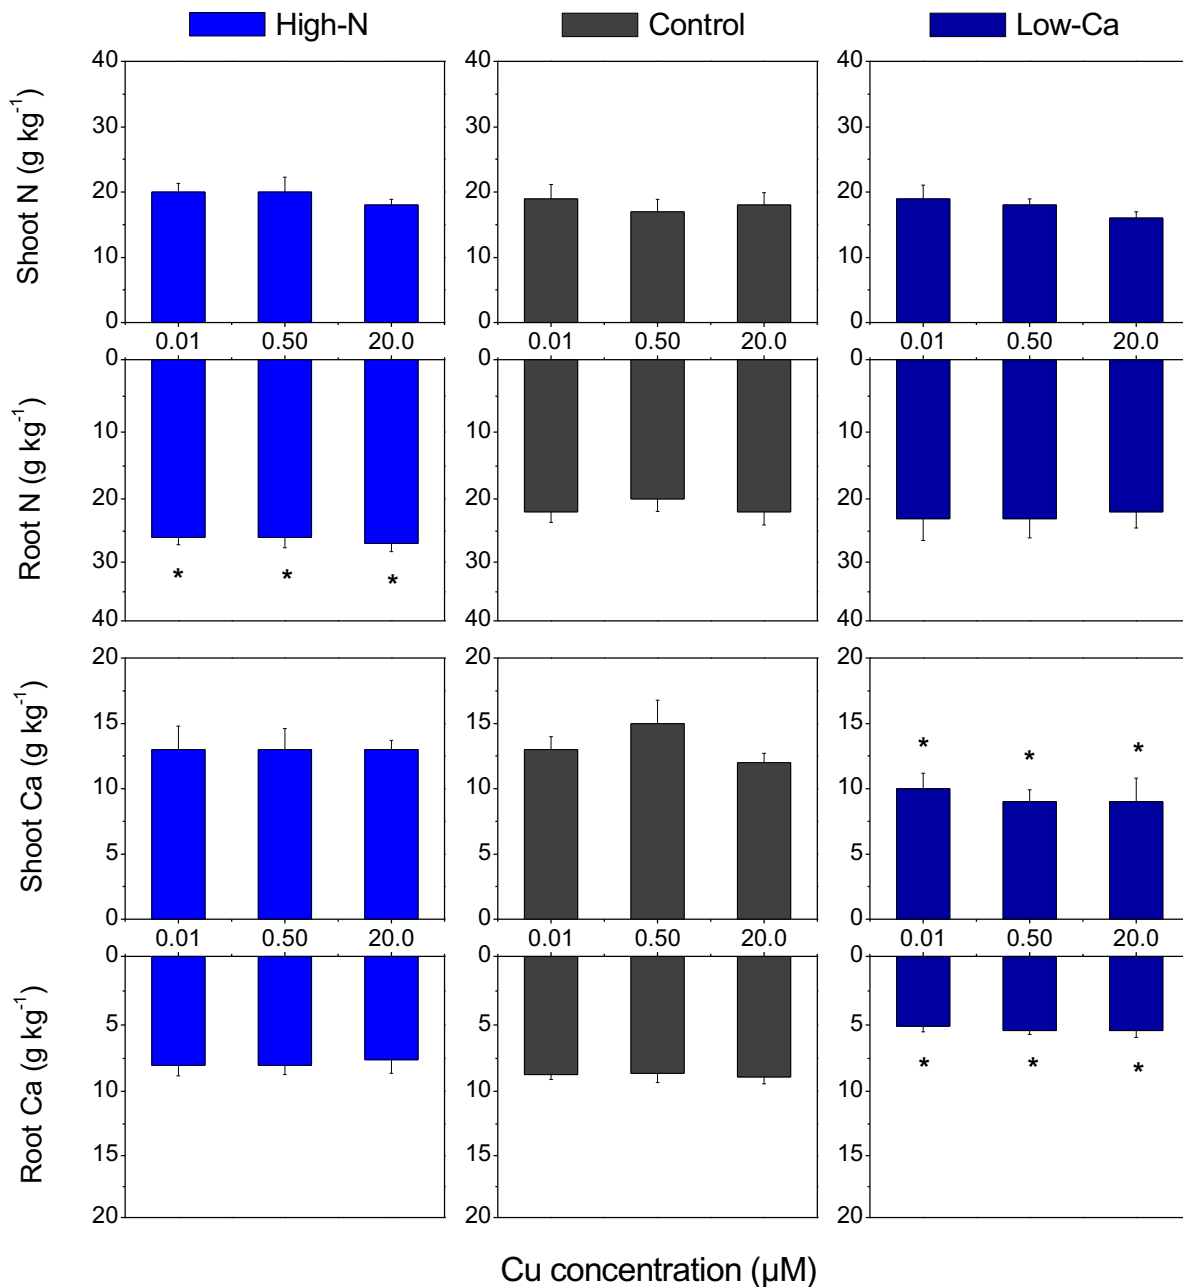

**Supplementary Figure S1. Nitrogen (N) and calcium (Ca) concentrations in Swingle citrumelo seedlings grown in nutrient solution with different levels of N (Experiment 1) or Ca (Experiment 2), and followed by 15 days in various copper (Cu) concentrations.** Legend: high-N: 16.4 mM N; Control: 9.4 mM N and 5.7 mM Ca; low-Ca: 1.0 mM Ca; Cu levels: means (n=5 or 10) followed by different lowercase letters are significantly different by Tukey's test ( $p < 0.05$ ). N or Ca levels: means (n=5 or 15) followed by an asterisk (\*) are significantly different by Tukey's test ( $p < 0.05$ ) when compared to the control.

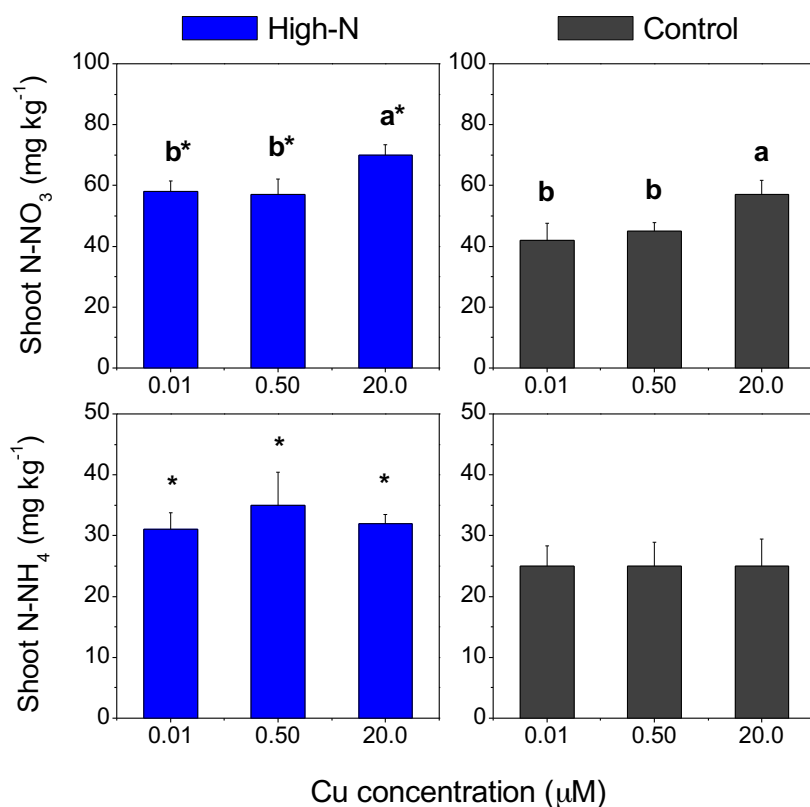

**Supplementary Figure S2. Nitrate (N-NO<sub>3</sub>) and ammonium (N-NH<sub>4</sub>) concentrations in the shoots of Swingle citrumelo seedlings, grown in nutrient solution with different levels of nitrogen (N; Experiment 1), and followed by 15 days in various copper (Cu) concentrations.**

Legend: high-N: 16.4 mM N; control: 9.4 mM N; Cu levels: means (n=5 or 10) followed by different lowercase letters are significantly different by Tukey's test ( $p < 0.05$ ). N levels: means (n=5 or 15) followed by an asterisk (\*) are significantly different by Tukey's test ( $p < 0.05$ ) when compared to the control.

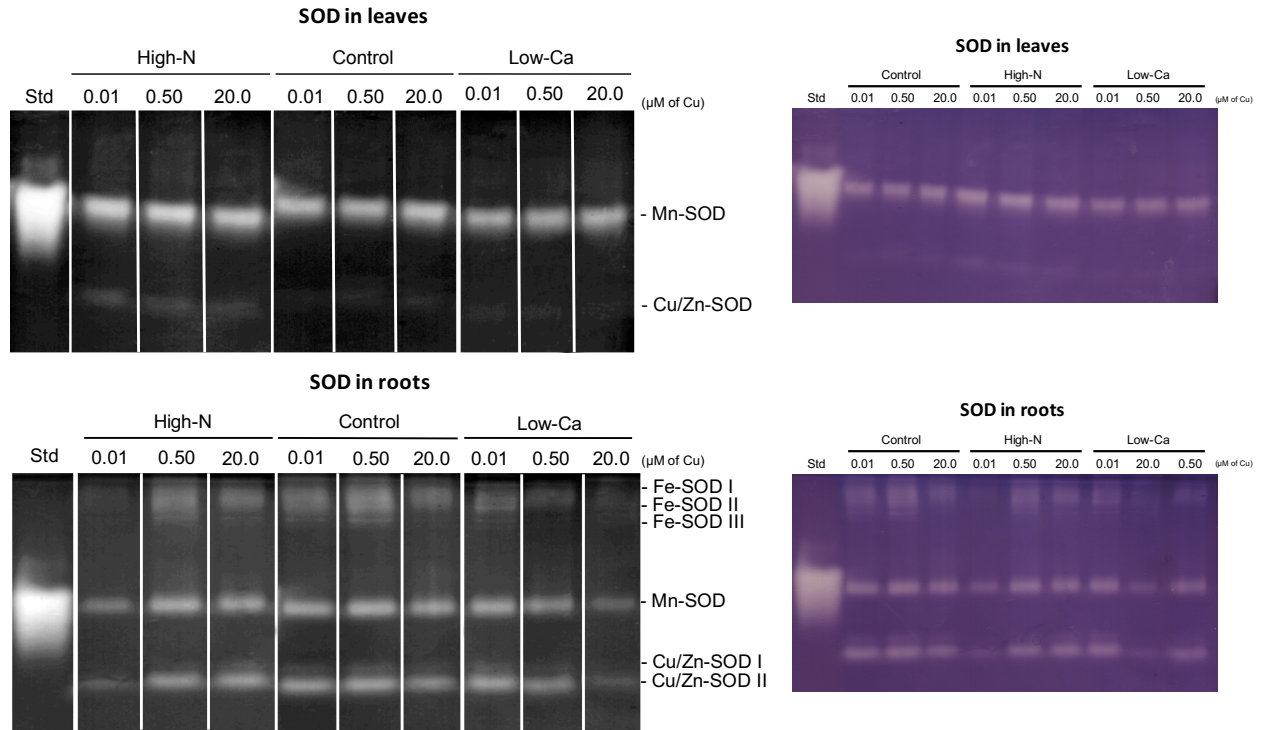

**Supplementary Figure S3. Polyacrylamide gel electrophoresis (PAGE 12%) of superoxide dismutase (SOD) activity in leaves and roots of Swingle citrumelo seedlings grown in nutrient solution with different levels of nitrogen (N; Experiment 1) or calcium (Ca; Experiment 2), and followed by 15 days in various copper (Cu) concentrations. Legend: Std – bovine liver SOD standard.**

## Analysis of variance (ANOVA) for all parameters evaluated in the Experiment 1 - Varying nitrogen and copper levels

**Table S1.** Anova for dry weight and leaf area data of Swingle citrumelo seedlings grown in nutrient solution with different levels of nitrogen (N; Experiment 1) or calcium (Ca; Experiment 2), followed by 15 days in various copper (Cu) concentrations.

### *Shoots dry weight*

| Source          | DF        | Anova SS  | Mean Square | F value | Pr>Fc  |
|-----------------|-----------|-----------|-------------|---------|--------|
| Nitrogen        | 1         | 0.399053  | 0.399053    | 1.299   | 0.2656 |
| Copper          | 2         | 0.033087  | 0.016543    | 0.054   | 0.9477 |
| N*Cu            | 2         | 2.543847  | 1.271923    | 4.141   | 0.0285 |
| error           | 24        | 7.371560  | 0.307148    |         |        |
| Corrected total | 29        | 10.347547 |             |         |        |
| Coeff Var (%) = | 17.70     |           |             |         |        |
| Mean:           | 3.1313333 | Number:   | 30          |         |        |

### *Roots dry weight*

| Source          | DF        | Anova SS | Mean Square | F value | Pr>Fc  |
|-----------------|-----------|----------|-------------|---------|--------|
| Nitrogen        | 1         | 0.074003 | 0.074003    | 0.850   | 0.3658 |
| Copper          | 2         | 0.799407 | 0.399703    | 4.589   | 0.0205 |
| N*Cu            | 2         | 0.285287 | 0.142643    | 1.638   | 0.2154 |
| error           | 24        | 2.090400 | 0.087100    |         |        |
| Corrected total | 29        | 3.249097 |             |         |        |
| Coeff Var (%) = | 21.39     |          |             |         |        |
| Mean:           | 1.3796667 | Number:  | 30          |         |        |

### *Leaf area*

| Source          | DF          | Anova SS     | Mean Square | F value | Pr>Fc  |
|-----------------|-------------|--------------|-------------|---------|--------|
| Nitrogen        | 1           | 107.541333   | 107.541333  | 0.292   | 0.5939 |
| Copper          | 2           | 330.764667   | 165.382333  | 0.449   | 0.6435 |
| N*Cu            | 2           | 4036.716667  | 2018.358333 | 5.480   | 0.0110 |
| error           | 24          | 8840.112000  | 368.338000  |         |        |
| Corrected total | 29          | 13315.134667 |             |         |        |
| Coeff Var (%) = | 17.35       |              |             |         |        |
| Mean:           | 110.5866667 | Number:      | 30          |         |        |

**Table S2.** Anova for copper (Cu) concentration and partition ratio of Cu ( $PR_{Cu}$ ) data in Swingle citrumelo seedlings grown in nutrient solution with different levels of nitrogen (N; Experiment 1) or calcium (Ca; Experiment 2), followed by 15 days in various Cu concentrations.

*Shoot Cu*

| Source          | DF        | Anova SS  | Mean Square | F value | Pr>Fc  |
|-----------------|-----------|-----------|-------------|---------|--------|
| Nitrogen        | 1         | 1.825333  | 1.825333    | 2.109   | 0.1593 |
| Copper          | 2         | 42.180667 | 21.090333   | 24.372  | 0.0000 |
| N*Cu            | 2         | 1.420667  | 0.710333    | 0.821   | 0.4520 |
| error           | 24        | 20.768000 | 0.865333    |         |        |
| Corrected total | 29        | 66.194667 |             |         |        |
| Coeff Var (%) = | 18.56     |           |             |         |        |
| Mean:           | 5.0133333 | Number:   | 30          |         |        |

*Root Cu*

| Source          | DF          | Anova SS      | Mean Square   | F value | Pr>Fc  |
|-----------------|-------------|---------------|---------------|---------|--------|
| Nitrogen        | 1           | 736.065333    | 736.065333    | 1.920   | 0.1786 |
| Copper          | 2           | 383664.932667 | 191832.466333 | 500.401 | 0.0000 |
| N*Cu            | 2           | 698.400667    | 349.200333    | 0.911   | 0.4156 |
| error           | 24          | 9200.576000   | 383.357333    |         |        |
| Corrected total | 29          | 394299.974667 |               |         |        |
| Coeff Var (%) = | 18.50       |               |               |         |        |
| Mean:           | 105.8466667 | Number:       | 30            |         |        |

*Partition ratio of Cu ( $PR_{Cu}$ )*

| Source          | DF         | Anova SS    | Mean Square | F value | Pr>Fc  |
|-----------------|------------|-------------|-------------|---------|--------|
| Nitrogen        | 1          | 223.041333  | 223.041333  | 9.907   | 0.0044 |
| Copper          | 2          | 5208.880667 | 2604.440333 | 115.681 | 0.0000 |
| N*Cu            | 2          | 106.360667  | 53.180333   | 3.362   | 0.0458 |
| error           | 24         | 540.336000  | 22.514000   |         |        |
| Corrected total | 29         | 6078.618667 |             |         |        |
| Coeff Var (%) = | 21.46      |             |             |         |        |
| Mean:           | 22.1066667 | Number:     | 30          |         |        |

**Table S3.** Anova for nitrate reductase (NRase) activity data in leaves of Swingle citrumelo seedlings, grown in nutrient solution with different levels of nitrogen (N; Experiment 1) or calcium (Ca; Experiment 2), and followed by 15 days in various copper (Cu) concentrations.

*Nitrate reductase activity (NRase)*

| Source          | DF          | Anova SS      | Mean Square   | F value | Pr>Fc  |
|-----------------|-------------|---------------|---------------|---------|--------|
| Nitrogen        | 1           | 264807.470083 | 264807.470083 | 82.756  | 0.0000 |
| Copper          | 2           | 294714.048447 | 147357.024223 | 46.051  | 0.0000 |
| N*Cu            | 2           | 16789.838407  | 8394.919203   | 3.624   | 0.0432 |
| error           | 24          | 76797.026400  | 3199.876100   |         |        |
| Corrected total | 29          | 653108.383337 |               |         |        |
| Coeff Var (%) = | 11.33       |               |               |         |        |
| Mean:           | 499.1343333 | Number:       | 30            |         |        |

**Table S4.** Anova for photosynthetic rate ( $P_N$ ), stomatal conductance ( $g_s$ ), internal CO<sub>2</sub> concentration ( $C_i$ ), apparent electron transport rate (ETR), transpiration ( $E$ ), instantaneous carboxylation efficiency ( $P_N/C_i$ ) and ETR/ $P_N$  ratio in leaves of Swingle citrumelo seedlings grown in nutrient solution with different levels of nitrogen (N; Experiment 1) or calcium (Ca; Experiment 2), and followed by 15 days in various copper (Cu) concentrations.

*Photosynthetic rate ( $P_N$ )*

| Source          | DF        | Anova SS   | Mean Square | F value | Pr>Fc  |
|-----------------|-----------|------------|-------------|---------|--------|
| Nitrogen        | 1         | 0.145186   | 0.145186    | 0.091   | 0.7658 |
| Copper          | 2         | 61.486762  | 30.743381   | 19.226  | 0.0000 |
| N*Cu            | 2         | 10.909283  | 5.454642    | 3.411   | 0.0497 |
| error           | 24        | 38.376459  | 1.599019    |         |        |
| Corrected total | 29        | 110.917691 |             |         |        |
| Coeff Var (%) = | 25.98     |            |             |         |        |
| Mean:           | 4.8681000 | Number:    | 30          |         |        |

*Stomatal conductance ( $g_s$ )*

| Source          | DF        | Anova SS | Mean Square | F value | Pr>Fc  |
|-----------------|-----------|----------|-------------|---------|--------|
| Nitrogen        | 1         | 0.000496 | 0.000496    | 2.094   | 0.1608 |
| Copper          | 2         | 0.007135 | 0.003568    | 15.060  | 0.0001 |
| N*Cu            | 2         | 0.002873 | 0.001436    | 6.063   | 0.0074 |
| error           | 24        | 0.005686 | 0.000237    |         |        |
| Corrected total | 29        | 0.016190 |             |         |        |
| Coeff Var (%) = | 34.20     |          |             |         |        |
| Mean:           | 0.0450000 | Number:  | 30          |         |        |

*Internal CO<sub>2</sub> concentration ( $C_i$ )*

| Source          | DF          | Anova SS     | Mean Square | F value | Pr>Fc  |
|-----------------|-------------|--------------|-------------|---------|--------|
| Nitrogen        | 1           | 2078.053350  | 2078.053350 | 3.730   | 0.0653 |
| Copper          | 2           | 1299.480759  | 649.740380  | 1.166   | 0.3286 |
| N*Cu            | 2           | 6816.210053  | 3408.105027 | 6.117   | 0.0071 |
| error           | 24          | 13371.101519 | 557.129230  |         |        |
| Corrected total | 29          | 23564.845681 |             |         |        |
| Coeff Var (%) = | 12.83       |              |             |         |        |
| Mean:           | 183.9507667 | Number:      | 30          |         |        |



*Instantaneous carboxylation efficiency ( $P_N/C_i$ )*

| Source          | DF        | Anova SS | Mean Square | F value | Pr>F <sub>c</sub> |
|-----------------|-----------|----------|-------------|---------|-------------------|
| Nitrogen        | 1         | 0.000198 | 0.000198    | 5.165   | 0.0323            |
| Copper          | 2         | 0.001678 | 0.000839    | 21.928  | 0.0000            |
| N*Cu            | 2         | 0.000212 | 0.000106    | 2.976   | 0.0493            |
| error           | 24        | 0.000918 | 0.000038    |         |                   |
| Corrected total | 29        | 0.003007 |             |         |                   |
| Coeff Var (%) = | 23.00     |          |             |         |                   |
| Mean:           | 0.0269000 | Number:  | 30          |         |                   |

*Transpiration (E)*

| Source          | DF        | Anova SS | Mean Square | F value | Pr>F <sub>c</sub> |
|-----------------|-----------|----------|-------------|---------|-------------------|
| Nitrogen        | 1         | 0.035639 | 0.035639    | 0.749   | 0.3952            |
| Copper          | 2         | 1.487253 | 0.743626    | 15.639  | 0.0000            |
| N*Cu            | 2         | 0.436116 | 0.218058    | 4.586   | 0.0206            |
| error           | 24        | 1.141214 | 0.047551    |         |                   |
| Corrected total | 29        | 3.100222 |             |         |                   |
| Coeff Var (%) = | 30.85     |          |             |         |                   |
| Mean:           | 0.7069333 | Number:  | 30          |         |                   |

**Table S5.** Anova for apparent electron transport rate (ETR), ratio between ETR and CO<sub>2</sub> assimilation (ETR/P<sub>N</sub>), alternative electron flow (AEF), the effective quantum yield of photosystem II ( $\Delta F/F_M'$ ), and the photochemical (*qP*) and non-photochemical quenching (*qNP*) data in leaves of Swingle citrumelo seedlings grown in nutrient solution with different levels of nitrogen (N; Experiment 1) or calcium (Ca; Experiment 2), and followed by 15 days in various copper (Cu) concentrations.

*Apparent electron transport rate (ETR)*

| Source          | DF         | Anova SS    | Mean Square | F value | Pr>Fc  |
|-----------------|------------|-------------|-------------|---------|--------|
| Nitrogen        | 1          | 30.122124   | 30.122124   | 0.881   | 0.3573 |
| Copper          | 2          | 1663.793191 | 831.896595  | 24.331  | 0.0000 |
| N*Cu            | 2          | 443.214058  | 221.607029  | 6.482   | 0.0056 |
| error           | 24         | 820.573092  | 34.190546   |         |        |
| Corrected total | 29         | 2957.702465 |             |         |        |
| Coeff Var (%) = | 10.13      |             |             |         |        |
| Mean:           | 57.7360333 | Number:     | 30          |         |        |

*Ratio between ETR and CO<sub>2</sub> assimilation (ETR/P<sub>N</sub>)*

| Source          | DF         | Anova SS   | Mean Square | F value | Pr>Fc  |
|-----------------|------------|------------|-------------|---------|--------|
| Nitrogen        | 1          | 10.917920  | 10.917920   | 0.457   | 0.5057 |
| Copper          | 2          | 179.757862 | 89.878931   | 3.758   | 0.0380 |
| N*Cu            | 2          | 44.473844  | 22.236922   | 0.930   | 0.4084 |
| error           | 24         | 573.958663 | 23.914944   |         |        |
| Corrected total | 29         | 809.108290 |             |         |        |
| Coeff Var (%) = | 36.74      |            |             |         |        |
| Mean:           | 13.3120000 | Number:    | 30          |         |        |

*Alternative electron flow (AEF)*

| Source          | DF         | Anova SS    | Mean Square | F value | Pr>Fc  |
|-----------------|------------|-------------|-------------|---------|--------|
| Nitrogen        | 1          | 609.175153  | 609.175153  | 44.634  | 0.0000 |
| Copper          | 2          | 2426.950229 | 1213.475114 | 88.911  | 0.0000 |
| N*Cu            | 2          | 263.412552  | 131.706276  | 9.650   | 0.0008 |
| error           | 24         | 327.558437  | 13.648268   |         |        |
| Corrected total | 29         | 3627.096371 |             |         |        |
| Coeff Var (%) = | 10.60      |             |             |         |        |
| Mean:           | 34.8441333 | Number:     | 30          |         |        |

*The effective quantum yield of photosystem II ( $\Delta F/F_M'$ )*

| Source          | DF        | Anova SS | Mean Square | F value | Pr>Fc  |
|-----------------|-----------|----------|-------------|---------|--------|
| Nitrogen        | 1         | 0.000320 | 0.000320    | 1.077   | 0.3097 |
| Copper          | 2         | 0.014015 | 0.007007    | 23.577  | 0.0000 |
| N*Cu            | 2         | 0.004021 | 0.002011    | 6.765   | 0.0047 |
| error           | 24        | 0.007133 | 0.000297    |         |        |
| Corrected total | 29        | 0.025489 |             |         |        |
| Coeff Var (%) = | 10.17     |          |             |         |        |
| Mean:           | 0.1694667 | Number:  | 30          |         |        |

*Photochemical quenching (qP)*

| Source          | DF        | Anova SS | Mean Square | F value | Pr>Fc  |
|-----------------|-----------|----------|-------------|---------|--------|
| Nitrogen        | 1         | 0.008069 | 0.008069    | 3.923   | 0.0592 |
| Copper          | 2         | 0.007446 | 0.003723    | 1.810   | 0.1853 |
| N*Cu            | 2         | 0.012152 | 0.006076    | 2.954   | 0.0713 |
| error           | 24        | 0.049366 | 0.002057    |         |        |
| Corrected total | 29        | 0.077033 |             |         |        |
| Coeff Var (%) = | 11.50     |          |             |         |        |
| Mean:           | 0.3943333 | Number:  | 30          |         |        |

*Non-photochemical quenching (qNP)*

| Source          | DF        | Anova SS | Mean Square | F value | Pr>Fc  |
|-----------------|-----------|----------|-------------|---------|--------|
| Nitrogen        | 1         | 0.004465 | 0.004465    | 0.034   | 0.8550 |
| Copper          | 2         | 3.665203 | 1.832602    | 14.013  | 0.0001 |
| N*Cu            | 2         | 1.440858 | 0.720429    | 5.509   | 0.0107 |
| error           | 24        | 3.138609 | 0.130775    |         |        |
| Corrected total | 29        | 8.249135 |             |         |        |
| Coeff Var (%) = | 19.10     |          |             |         |        |
| Mean:           | 1.8934667 | Number:  | 30          |         |        |

**Table S6.** Anova for hydrogen peroxide (H<sub>2</sub>O<sub>2</sub>) concentration and lipid peroxidation (malonaldehyde, MDA) data in Swingle citrumelo seedlings grown in nutrient solution with different levels of nitrogen (N; Experiment 1) or calcium (Ca; Experiment 2), and followed by 15 days in various copper (Cu) concentrations.

*Leaf H<sub>2</sub>O<sub>2</sub>*

| Source          | DF        | Anova SS | Mean Square | F value | Pr>F <sub>c</sub> |
|-----------------|-----------|----------|-------------|---------|-------------------|
| Nitrogen        | 1         | 0.563070 | 0.563070    | 9.738   | 0.0047            |
| Copper          | 2         | 7.357820 | 3.678910    | 63.627  | 0.0000            |
| N*Cu            | 2         | 0.434660 | 0.217330    | 3.759   | 0.0380            |
| error           | 24        | 1.387680 | 0.057820    |         |                   |
| Corrected total | 29        | 9.743230 |             |         |                   |
| Coeff Var (%) = | 15.19     |          |             |         |                   |
| Mean:           | 1.5830000 | Number:  | 30          |         |                   |

*Root H<sub>2</sub>O<sub>2</sub>*

| Source          | DF        | Anova SS | Mean Square | F value | Pr>F <sub>c</sub> |
|-----------------|-----------|----------|-------------|---------|-------------------|
| Nitrogen        | 1         | 0.007053 | 0.007053    | 12.023  | 0.0020            |
| Copper          | 2         | 0.060807 | 0.030403    | 51.824  | 0.0000            |
| N*Cu            | 2         | 0.004407 | 0.002203    | 3.756   | 0.0381            |
| error           | 24        | 0.014080 | 0.000587    |         |                   |
| Corrected total | 29        | 0.086347 |             |         |                   |
| Coeff Var (%) = | 18.82     |          |             |         |                   |
| Mean:           | 0.1286667 | Number:  | 30          |         |                   |

*Leaf MDA*

| Source          | DF        | Anova SS | Mean Square | F value | Pr>F <sub>c</sub> |
|-----------------|-----------|----------|-------------|---------|-------------------|
| Nitrogen        | 1         | 0.000853 | 0.000853    | 0.102   | 0.7527            |
| Copper          | 2         | 1.938007 | 0.969003    | 115.358 | 0.0000            |
| N*Cu            | 2         | 0.122127 | 0.061063    | 7.269   | 0.0034            |
| error           | 24        | 0.201600 | 0.008400    |         |                   |
| Corrected total | 29        | 2.262587 |             |         |                   |
| Coeff Var (%) = | 11.74     |          |             |         |                   |
| Mean:           | 0.7806667 | Number:  | 30          |         |                   |

*Root MDA*

| Source          | DF        | Anova SS | Mean Square | F value | Pr>F <sub>c</sub> |
|-----------------|-----------|----------|-------------|---------|-------------------|
| Nitrogen        | 1         | 0.002803 | 0.002803    | 0.787   | 0.3838            |
| Copper          | 2         | 0.318647 | 0.159323    | 44.733  | 0.0000            |
| N*Cu            | 2         | 0.024407 | 0.012203    | 3.426   | 0.0491            |
| error           | 24        | 0.085480 | 0.003562    |         |                   |
| Corrected total | 29        | 0.431337 |             |         |                   |
| Coeff Var (%) = | 18.21     |          |             |         |                   |
| Mean:           | 0.3276667 | Number:  | 30          |         |                   |

**Table S8.** Anova for catalase (CAT), ascorbate peroxidase (APX) and guaiacol peroxidase (POX) activities data in Swingle citrumelo seedlings grown in nutrient solution with different levels of nitrogen (N; Experiment 1) or calcium (Ca; Experiment 2), followed by 15 days in various copper (Cu) concentrations.

*Leaf CAT*

| Source          | DF        | Anova SS  | Mean Square | F value | Pr>F <sub>c</sub> |
|-----------------|-----------|-----------|-------------|---------|-------------------|
| Nitrogen        | 1         | 9.229653  | 9.229653    | 25.968  | 0.0000            |
| Copper          | 2         | 52.729620 | 26.364810   | 74.178  | 0.0000            |
| N*Cu            | 2         | 0.117167  | 0.058583    | 0.165   | 0.8490            |
| error           | 24        | 8.530280  | 0.355428    |         |                   |
| Corrected total | 29        | 70.606720 |             |         |                   |
| Coeff Var (%) = | 13.06     |           |             |         |                   |
| Mean:           | 4.5640000 | Number:   | 30          |         |                   |

*Root CAT*

| Source          | DF        | Anova SS  | Mean Square | F value | Pr>F <sub>c</sub> |
|-----------------|-----------|-----------|-------------|---------|-------------------|
| Nitrogen        | 1         | 9.218563  | 9.218563    | 47.341  | 0.0000            |
| Copper          | 2         | 73.849447 | 36.924723   | 189.625 | 0.0000            |
| N*Cu            | 2         | 0.446607  | 0.223303    | 1.147   | 0.3345            |
| error           | 24        | 4.673400  | 0.194725    |         |                   |
| Corrected total | 29        | 88.188017 |             |         |                   |
| Coeff Var (%) = | 12.05     |           |             |         |                   |
| Mean:           | 3.6616667 | Number:   | 30          |         |                   |

*Leaf APX*

| Source          | DF         | Anova SS   | Mean Square | F value | Pr>F <sub>c</sub> |
|-----------------|------------|------------|-------------|---------|-------------------|
| Nitrogen        | 1          | 6.265470   | 6.265470    | 3.172   | 0.0476            |
| Copper          | 2          | 576.482247 | 288.241123  | 136.723 | 0.0000            |
| N*Cu            | 2          | 0.708500   | 0.354250    | 0.168   | 0.8463            |
| erro            | 24         | 50.597200  | 2.108217    |         |                   |
| Corrected total | 29         | 634.053417 |             |         |                   |
| Coeff Var (%) = | 11.84      |            |             |         |                   |
| Mean:           | 12.2616667 | Number:    | 30          |         |                   |

*Root APX*

| Source          | DF         | Anova SS    | Mean Square | F value | Pr>F <sub>c</sub> |
|-----------------|------------|-------------|-------------|---------|-------------------|
| Nitrogen        | 1          | 178.266563  | 178.266563  | 8.422   | 0.0078            |
| Copper          | 2          | 1988.618660 | 994.309330  | 46.973  | 0.0000            |
| N*Cu            | 2          | 88.257647   | 44.128823   | 2.085   | 0.1463            |
| error           | 24         | 508.021280  | 21.167553   |         |                   |
| Corrected total | 29         | 2763.164150 |             |         |                   |
| Coeff Var (%) = | 21.25      |             |             |         |                   |
| Mean:           | 21.6550000 | Number:     | 30          |         |                   |

*Leaf POX*

| Source          | DF         | Anova SS    | Mean Square | F value | Pr>Fc  |
|-----------------|------------|-------------|-------------|---------|--------|
| Nitrogen        | 1          | 62.507881   | 62.507881   | 17.420  | 0.0003 |
| Copper          | 2          | 911.286263  | 455.643132  | 126.978 | 0.0000 |
| N*Cu            | 2          | 13.636782   | 6.818391    | 1.900   | 0.1714 |
| error           | 24         | 86.120904   | 3.588371    |         |        |
| Corrected total | 29         | 1073.551830 |             |         |        |
| Coeff Var (%) = | 12.83      |             |             |         |        |
| Mean:           | 14.7609333 | Number:     | 30          |         |        |

*Root POX*

| Source          | DF         | Anova SS    | Mean Square | F value | Pr>Fc  |
|-----------------|------------|-------------|-------------|---------|--------|
| Nitrogen        | 1          | 18.767266   | 18.767266   | 1.352   | 0.2564 |
| Copper          | 2          | 2217.601847 | 1108.800924 | 79.851  | 0.0000 |
| N*Cu            | 2          | 50.180477   | 25.090239   | 1.807   | 0.1858 |
| error           | 24         | 333.259691  | 13.885820   |         |        |
| Corrected total | 29         | 2619.809281 |             |         |        |
| Coeff Var (%) = | 19.98      |             |             |         |        |
| Mean:           | 18.6504667 | Number:     | 30          |         |        |

**Table S9.** Anova for nitrogen (N) and calcium (Ca) concentrations data in Swingle citrumelo seedlings grown in nutrient solution with different levels of N (Experiment 1) or Ca (Experiment 2), and followed by 15 days in various copper (Cu) concentrations.

*Shoot N*

| Source          | DF         | Anova SS   | Mean Square | F value | Pr>Fc  |
|-----------------|------------|------------|-------------|---------|--------|
| Nitrogen        | 1          | 21.168000  | 21.168000   | 6.645   | 0.0165 |
| Copper          | 2          | 6.264667   | 3.132333    | 0.983   | 0.3886 |
| N*Cu            | 2          | 6.498000   | 3.249000    | 1.020   | 0.3757 |
| error           | 24         | 76.448000  | 3.185333    |         |        |
| Corrected total | 29         | 110.378667 |             |         |        |
| Coeff Var (%) = | 9.56       |            |             |         |        |
| Mean:           | 18.6733333 | Number:    | 30          |         |        |

*Root N*

| Source          | DF         | Anova SS   | Mean Square | F value | Pr>Fc  |
|-----------------|------------|------------|-------------|---------|--------|
| Nitrogen        | 1          | 33.708000  | 33.708000   | 4.315   | 0.0486 |
| Copper          | 2          | 11.330667  | 5.665333    | 0.725   | 0.4945 |
| N*Cu            | 2          | 5.928000   | 2.964000    | 0.379   | 0.6883 |
| error           | 24         | 187.472000 | 7.811333    |         |        |
| Corrected total | 29         | 238.438667 |             |         |        |
| Coeff Var (%) = | 11.41      |            |             |         |        |
| Mean:           | 24.4933333 | Number:    | 30          |         |        |

*Shoot Ca*

| Source          | DF         | Anova SS  | Mean Square | F value | Pr>Fc  |
|-----------------|------------|-----------|-------------|---------|--------|
| Nitrogen        | 1          | 5.043000  | 5.043000    | 2.438   | 0.1315 |
| Copper          | 2          | 7.900667  | 3.950333    | 1.910   | 0.1700 |
| N*Cu            | 2          | 7.358000  | 3.679000    | 1.778   | 0.1904 |
| error           | 24         | 49.648000 | 2.068667    |         |        |
| Corrected total | 29         | 69.949667 |             |         |        |
| Coeff Var (%) = | 10.95      |           |             |         |        |
| Mean:           | 13.1366667 | Number:   | 30          |         |        |

*Root Ca*

| Source          | DF        | Anova SS  | Mean Square | F value | Pr>Fc  |
|-----------------|-----------|-----------|-------------|---------|--------|
| Nitrogen        | 1         | 6.165333  | 6.165333    | 2.999   | 0.0520 |
| Copper          | 2         | 0.040667  | 0.020333    | 0.040   | 0.9613 |
| N*Cu            | 2         | 0.880667  | 0.440333    | 0.857   | 0.4370 |
| error           | 24        | 12.332000 | 0.513833    |         |        |
| Corrected total | 29        | 19.418667 |             |         |        |
| Coeff Var (%) = | 8.64      |           |             |         |        |
| Mean:           | 8.2933333 | Number:   | 30          |         |        |

## Analysis of variance (ANOVA) for all parameters evaluated in the Experiment 2 - Varying calcium and copper levels

**Table S10.** Anova for dry weight and leaf area data of Swingle citrumelo seedlings grown in nutrient solution with different levels of nitrogen (N; Experiment 1) or calcium (Ca; Experiment 2), followed by 15 days in various copper (Cu) concentrations.

### *Shoots dry weight*

| Source          | DF        | Anova SS | Mean Square | F value | Pr>Fc  |
|-----------------|-----------|----------|-------------|---------|--------|
| Calcium         | 1         | 0.003000 | 0.003000    | 0.014   | 0.9066 |
| Copper          | 2         | 1.280220 | 0.640110    | 3.904   | 0.0321 |
| Ca*Cu           | 2         | 0.321860 | 0.160930    | 0.755   | 0.4809 |
| error           | 24        | 5.115840 | 0.213160    |         |        |
| Corrected total | 29        | 6.720920 |             |         |        |
| Coeff Var (%) = | 15.36     |          |             |         |        |
| Mean:           | 3.0060000 | Number:  | 30          |         |        |

### *Roots dry weight*

| Source          | DF        | Anova SS | Mean Square | F value | Pr>Fc  |
|-----------------|-----------|----------|-------------|---------|--------|
| Calcium         | 1         | 0.012403 | 0.012403    | 0.288   | 0.5963 |
| Copper          | 2         | 0.455887 | 0.227943    | 5.296   | 0.0124 |
| Ca*Cu           | 2         | 0.474327 | 0.237163    | 5.511   | 0.0107 |
| error           | 24        | 1.032880 | 0.043037    |         |        |
| Corrected total | 29        | 1.975497 |             |         |        |
| Coeff Var (%) = | 15.84     |          |             |         |        |
| Mean:           | 1.3096667 | Number:  | 30          |         |        |

### *Leaf area*

| Source          | DF          | Anova SS     | Mean Square | F value | Pr>Fc  |
|-----------------|-------------|--------------|-------------|---------|--------|
| Calcium         | 1           | 295.788000   | 295.788000  | 0.826   | 0.3726 |
| Copper          | 2           | 1996.248667  | 998.124333  | 3.586   | 0.0316 |
| Ca*Cu           | 2           | 802.982000   | 401.491000  | 3.121   | 0.0425 |
| error           | 24          | 8598.136000  | 358.255667  |         |        |
| Corrected total | 29          | 11693.154667 |             |         |        |
| Coeff Var (%) = | 17.93       |              |             |         |        |
| Mean:           | 105.5533333 | Number:      | 30          |         |        |



**Table S11.** Anova for copper (Cu) concentration and partition ratio of Cu ( $PR_{Cu}$ ) data in Swingle citrumelo seedlings grown in nutrient solution with different levels of nitrogen (N; Experiment 1) or calcium (Ca; Experiment 2), followed by 15 days in various Cu concentrations.

*Shoot Cu*

| Source          | DF        | Anova SS  | Mean Square | F value | Pr>Fc  |
|-----------------|-----------|-----------|-------------|---------|--------|
| Calcium         | 1         | 1.776333  | 1.776333    | 2.164   | 0.1543 |
| Copper          | 2         | 32.500667 | 16.250333   | 19.793  | 0.0000 |
| Ca*Cu           | 2         | 0.240667  | 0.120333    | 0.147   | 0.8644 |
| error           | 24        | 19.704000 | 0.821000    |         |        |
| Corrected total | 29        | 54.221667 |             |         |        |
| Coeff Var (%) = | 18.06     |           |             |         |        |
| Mean:           | 5.0166667 | Number:   | 30          |         |        |

*Root Cu*

| Source          | DF          | Anova SS      | Mean Square   | F value | Pr>Fc  |
|-----------------|-------------|---------------|---------------|---------|--------|
| Calcium         | 1           | 2150.533333   | 2150.533333   | 4.362   | 0.0475 |
| Copper          | 2           | 494860.850667 | 247430.425333 | 501.834 | 0.0000 |
| Ca*Cu           | 2           | 10792.674667  | 5396.337333   | 10.945  | 0.0004 |
| error           | 24          | 11833.248000  | 493.052000    |         |        |
| Corrected total | 29          | 519637.306667 |               |         |        |
| Coeff Var (%) = | 18.62       |               |               |         |        |
| Mean:           | 119.2666667 | Number:       | 30            |         |        |

*Partition ratio of Cu ( $PR_{Cu}$ )*

| Source          | DF         | Anova SS    | Mean Square | F value | Pr>Fc  |
|-----------------|------------|-------------|-------------|---------|--------|
| Calcium         | 1          | 37.856333   | 37.856333   | 2.367   | 0.1370 |
| Copper          | 2          | 4342.244667 | 2171.122333 | 135.774 | 0.0000 |
| Ca*Cu           | 2          | 106.972667  | 53.486333   | 3.345   | 0.0493 |
| error           | 24         | 383.776000  | 15.990667   |         |        |
| Corrected total | 29         | 4870.849667 |             |         |        |
| Coeff Var (%) = | 19.50      |             |             |         |        |
| Mean:           | 20.5033333 | Number:     | 30          |         |        |

**Table S12.** Anova for nitrate reductase (NRase) activity data in leaves of Swingle citrumelo seedlings, grown in nutrient solution with different levels of nitrogen (N; Experiment 1) or calcium (Ca; Experiment 2), and followed by 15 days in various copper (Cu) concentrations.

*Nitrate reductase activity (NRase)*

| Source          | DF          | Anova SS      | Mean Square   | F value | Pr>F <sub>c</sub> |
|-----------------|-------------|---------------|---------------|---------|-------------------|
| Calcium         | 1           | 113929.218750 | 113929.218750 | 52.502  | 0.0000            |
| Copper          | 2           | 128468.069047 | 64234.034523  | 29.601  | 0.0000            |
| Ca*Cu           | 2           | 19520.488860  | 9760.244430   | 4.498   | 0.0219            |
| error           | 24          | 52079.755880  | 2169.989828   |         |                   |
| Corrected total | 29          | 313997.532537 |               |         |                   |
| Coeff Var (%) = | 13.56       |               |               |         |                   |
| Mean:           | 343.5576667 | Number:       | 30            |         |                   |

**Table S13.** Anova for photosynthetic rate ( $P_N$ ), stomatal conductance ( $g_s$ ), internal CO<sub>2</sub> concentration ( $C_i$ ), apparent electron transport rate (ETR), transpiration ( $E$ ), instantaneous carboxylation efficiency ( $P_N/C_i$ ) and ETR/ $P_N$  ratio data in leaves of Swingle citrumelo seedlings grown in nutrient solution with different levels of nitrogen (N; Experiment 1) or calcium (Ca; Experiment 2), and followed by 15 days in various copper (Cu) concentrations.

*Photosynthetic rate ( $P_N$ )*

| Source          | DF        | Anova SS   | Mean Square | F value | Pr>Fc  |
|-----------------|-----------|------------|-------------|---------|--------|
| Calcium         | 1         | 0.244803   | 0.244803    | 0.188   | 0.6686 |
| Copper          | 2         | 143.044247 | 71.522123   | 54.867  | 0.0000 |
| Ca*Cu           | 2         | 2.936327   | 1.468163    | 1.126   | 0.3408 |
| error           | 24        | 31.285160  | 1.303548    |         |        |
| Corrected total | 29        | 177.510537 |             |         |        |
| Coeff Var (%) = | 24.25     |            |             |         |        |
| Mean:           | 4.7076667 | Number:    | 30          |         |        |

*Stomatal conductance ( $g_s$ )*

| Source          | DF        | Anova SS | Mean Square | F value | Pr>Fc  |
|-----------------|-----------|----------|-------------|---------|--------|
| Calcium         | 1         | 0.000626 | 0.000626    | 2.883   | 0.1025 |
| Copper          | 2         | 0.017379 | 0.008689    | 40.040  | 0.0000 |
| Ca*Cu           | 2         | 0.000043 | 0.000021    | 0.099   | 0.9063 |
| error           | 24        | 0.005208 | 0.000217    |         |        |
| Corrected total | 29        | 0.023256 |             |         |        |
| Coeff Var (%) = | 33.10     |          |             |         |        |
| Mean:           | 0.0445000 | Number:  | 30          |         |        |

*Internal CO<sub>2</sub> concentration ( $C_i$ )*

| Source          | DF          | Anova SS     | Mean Square | F value | Pr>Fc  |
|-----------------|-------------|--------------|-------------|---------|--------|
| Calcium         | 1           | 121.203000   | 121.203000  | 0.140   | 0.7120 |
| Copper          | 2           | 11081.192667 | 5540.596333 | 6.381   | 0.0060 |
| Ca*Cu           | 2           | 3935.774000  | 1967.887000 | 3.266   | 0.0454 |
| error           | 24          | 20839.600000 | 868.316667  |         |        |
| Corrected total | 29          | 35977.769667 |             |         |        |
| Coeff Var (%) = | 15.49       |              |             |         |        |
| Mean:           | 119.2666667 | Number:      | 30          |         |        |

*Instantaneous carboxylation efficiency ( $P_N/C_i$ )*

| Source          | DF        | Anova SS | Mean Square | F value | Pr>Fc  |
|-----------------|-----------|----------|-------------|---------|--------|
| Calcium         | 1         | 0.000004 | 0.000004    | 0.095   | 0.7609 |
| Copper          | 2         | 0.002307 | 0.001153    | 27.094  | 0.0000 |
| Ca*Cu           | 2         | 0.000154 | 0.000077    | 1.810   | 0.1853 |
| error           | 24        | 0.001022 | 0.000043    |         |        |
| Corrected total | 29        | 0.003486 |             |         |        |
| Coeff Var (%) = | 26.41     |          |             |         |        |
| Mean:           | 0.0247000 | Number:  | 30          |         |        |

*Transpiration (E)*

| Source          | DF        | Anova SS | Mean Square | F value | Pr>Fc  |
|-----------------|-----------|----------|-------------|---------|--------|
| Calcium         | 1         | 0.010830 | 0.010830    | 0.219   | 0.6443 |
| Copper          | 2         | 4.099220 | 2.049610    | 41.385  | 0.0000 |
| Ca*Cu           | 2         | 0.036780 | 0.018390    | 0.371   | 0.6937 |
| error           | 24        | 1.188600 | 0.049525    |         |        |
| Corrected total | 29        | 5.335430 |             |         |        |
| Coeff Var (%) = | 30.78     |          |             |         |        |
| Mean:           | 0.7230000 | Number:  | 30          |         |        |

**Table S14.** Anova for apparent electron transport rate (ETR), ratio between ETR and CO<sub>2</sub> assimilation (ETR/P<sub>N</sub>), alternative electron flow (AEF), the effective quantum yield of photosystem II ( $\Delta F/F_M'$ ), and the photochemical ( $qP$ ) and non-photochemical quenching ( $qNP$ ) data in leaves of Swingle citrumelo seedlings grown in nutrient solution with different levels of nitrogen (N; Experiment 1) or calcium (Ca; Experiment 2), and followed by 15 days in various copper (Cu) concentrations.

*Apparent electron transport rate (ETR)*

| Source          | DF         | Anova SS    | Mean Square | F value | Pr>Fc  |
|-----------------|------------|-------------|-------------|---------|--------|
| Calcium         | 1          | 176.758413  | 176.758413  | 1.679   | 0.2074 |
| Copper          | 2          | 4859.193087 | 2429.596543 | 23.072  | 0.0000 |
| Ca*Cu           | 2          | 1859.727847 | 929.863923  | 8.830   | 0.0013 |
| error           | 24         | 2527.341320 | 105.305888  |         |        |
| Corrected total | 29         | 9423.020667 |             |         |        |
| Coeff Var (%) = | 18.90      |             |             |         |        |
| Mean:           | 54.3066667 | Number:     | 30          |         |        |

*Ratio between ETR and CO<sub>2</sub> assimilation (ETR/P<sub>N</sub>)*

| Source          | DF         | Anova SS   | Mean Square | F value | Pr>Fc  |
|-----------------|------------|------------|-------------|---------|--------|
| Calcium         | 1          | 16.118670  | 16.118670   | 1.260   | 0.2727 |
| Copper          | 2          | 304.358827 | 152.179413  | 11.897  | 0.0003 |
| Ca*Cu           | 2          | 53.431440  | 26.715720   | 2.089   | 0.1458 |
| error           | 24         | 306.999000 | 12.791625   |         |        |
| Corrected total | 29         | 680.907937 |             |         |        |
| Coeff Var (%) = | 27.13      |            |             |         |        |
| Mean:           | 13.1823333 | Number:    | 30          |         |        |

*Alternative electron flow (AEF)*

| Source          | DF         | Anova SS    | Mean Square | F value | Pr>Fc  |
|-----------------|------------|-------------|-------------|---------|--------|
| Calcium         | 1          | 634.800000  | 634.800000  | 52.621  | 0.0000 |
| Copper          | 2          | 4759.754667 | 2379.877333 | 197.276 | 0.0000 |
| Ca*Cu           | 2          | 13.272000   | 6.636000    | 0.550   | 0.5840 |
| error           | 24         | 289.528000  | 12.063667   |         |        |
| Corrected total | 29         | 5697.354667 |             |         |        |
| Coeff Var (%) = | 9.94       |             |             |         |        |
| Mean:           | 34.9466667 | Number:     | 30          |         |        |

*The effective quantum yield of photosystem II ( $\Delta F/F_M'$ )*

| Source          | DF        | Anova SS | Mean Square | F value | Pr>Fc  |
|-----------------|-----------|----------|-------------|---------|--------|
| Calcium         | 1         | 0.001360 | 0.001360    | 1.497   | 0.2331 |
| Copper          | 2         | 0.042549 | 0.021275    | 23.411  | 0.0000 |
| Ca*Cu           | 2         | 0.015872 | 0.007936    | 8.733   | 0.0014 |
| error           | 24        | 0.021810 | 0.000909    |         |        |
| Corrected total | 29        | 0.081591 |             |         |        |
| Coeff Var (%) = | 18.90     |          |             |         |        |
| Mean:           | 0.1594667 | Number:  | 30          |         |        |

*Photochemical quenching (qP)*

| Source          | DF        | Anova SS | Mean Square | F value | Pr>Fc  |
|-----------------|-----------|----------|-------------|---------|--------|
| Calcium         | 1         | 0.013063 | 0.013063    | 2.107   | 0.1596 |
| Copper          | 2         | 0.072657 | 0.036329    | 5.859   | 0.0085 |
| Ca*Cu           | 2         | 0.104909 | 0.052454    | 8.460   | 0.0017 |
| error           | 24        | 0.148799 | 0.006200    |         |        |
| Corrected total | 29        | 0.339428 |             |         |        |
| Coeff Var (%) = | 22.05     |          |             |         |        |
| Mean:           | 0.3570667 | Number:  | 30          |         |        |

*Non-photochemical quenching (qNP)*

| Source          | DF        | Anova SS | Mean Square | F value | Pr>Fc  |
|-----------------|-----------|----------|-------------|---------|--------|
| Calcium         | 1         | 0.504403 | 0.504403    | 3.822   | 0.0623 |
| Copper          | 2         | 4.689380 | 2.344690    | 17.769  | 0.0000 |
| Ca*Cu           | 2         | 1.102687 | 0.551343    | 4.178   | 0.0277 |
| error           | 24        | 3.166960 | 0.131957    |         |        |
| Corrected total | 29        | 9.463430 |             |         |        |
| Coeff Var (%) = | 20.72     |          |             |         |        |
| Mean:           | 1.7530000 | Number:  | 30          |         |        |

**Table S15.** Anova for hydrogen peroxide (H<sub>2</sub>O<sub>2</sub>) concentration and lipid peroxidation (malonaldehyde, MDA) data in Swingle citrumelo seedlings grown in nutrient solution with different levels of nitrogen (N; Experiment 1) or calcium (Ca; Experiment 2), and followed by 15 days in various copper (Cu) concentrations.

*Leaf H<sub>2</sub>O<sub>2</sub>*

| Source          | DF        | Anova SS  | Mean Square | F value | Pr>F <sub>c</sub> |
|-----------------|-----------|-----------|-------------|---------|-------------------|
| Calcium         | 1         | 1.075413  | 1.075413    | 63.577  | 0.0000            |
| Copper          | 2         | 9.479787  | 4.739893    | 280.218 | 0.0000            |
| Ca*Cu           | 2         | 0.096027  | 0.048013    | 3.039   | 0.0483            |
| error           | 24        | 0.405960  | 0.016915    |         |                   |
| Corrected total | 29        | 11.057187 |             |         |                   |
| Coeff Var (%) = | 6.81      |           |             |         |                   |
| Mean:           | 1.9093333 | Number:   | 30          |         |                   |

*Root H<sub>2</sub>O<sub>2</sub>*

| Source          | DF        | Anova SS | Mean Square | F value | Pr>F <sub>c</sub> |
|-----------------|-----------|----------|-------------|---------|-------------------|
| Calcium         | 1         | 0.008333 | 0.008333    | 21.930  | 0.0001            |
| Copper          | 2         | 0.120987 | 0.060493    | 159.193 | 0.0000            |
| Ca*Cu           | 2         | 0.001947 | 0.000973    | 3.061   | 0.0481            |
| error           | 24        | 0.009120 | 0.000380    |         |                   |
| Corrected total | 29        | 0.140387 |             |         |                   |
| Coeff Var (%) = | 12.13     |          |             |         |                   |
| Mean:           | 0.1606667 | Number:  | 30          |         |                   |

*Leaf MDA*

| Source          | DF        | Anova SS | Mean Square | F value | Pr>F <sub>c</sub> |
|-----------------|-----------|----------|-------------|---------|-------------------|
| Calcium         | 1         | 0.538680 | 0.538680    | 54.202  | 0.0000            |
| Copper          | 2         | 2.379620 | 1.189810    | 119.719 | 0.0000            |
| Ca*Cu           | 2         | 0.038780 | 0.019390    | 1.951   | 0.1640            |
| error           | 24        | 0.238520 | 0.009938    |         |                   |
| Corrected total | 29        | 3.195600 |             |         |                   |
| Coeff Var (%) = | 10.84     |          |             |         |                   |
| Mean:           | 0.9200000 | Number:  | 30          |         |                   |

*Root MDA*

| Source          | DF        | Anova SS | Mean Square | F value | Pr>F <sub>c</sub> |
|-----------------|-----------|----------|-------------|---------|-------------------|
| Calcium         | 1         | 0.027000 | 0.027000    | 9.441   | 0.0052            |
| Copper          | 2         | 0.304287 | 0.152143    | 53.197  | 0.0000            |
| Ca*Cu           | 2         | 0.014660 | 0.007330    | 3.263   | 0.0420            |
| error           | 24        | 0.068640 | 0.002860    |         |                   |
| Corrected total | 29        | 0.414587 |             |         |                   |
| Coeff Var (%) = | 14.56     |          |             |         |                   |
| Mean:           | 0.3673333 | Number:  | 30          |         |                   |

**Table S16.** Anova for catalase (CAT), ascorbate peroxidase (APX) and guaiacol peroxidase (POX) activities data in Swingle citrumelo seedlings grown in nutrient solution with different levels of nitrogen (N; Experiment 1) or calcium (Ca; Experiment 2), followed by 15 days in various copper (Cu) concentrations.

*Leaf CAT*

| Source          | DF        | Anova SS  | Mean Square | F value | Pr>F <sub>c</sub> |
|-----------------|-----------|-----------|-------------|---------|-------------------|
| Calcium         | 1         | 4.531853  | 4.531853    | 13.126  | 0.0014            |
| Copper          | 2         | 37.762667 | 18.881333   | 54.690  | 0.0000            |
| Ca*Cu           | 2         | 0.932587  | 0.466293    | 1.351   | 0.2781            |
| error           | 24        | 8.285880  | 0.345245    |         |                   |
| Corrected total | 29        | 51.512987 |             |         |                   |
| Coeff Var (%) = | 16.23     |           |             |         |                   |
| Mean:           | 3.6206667 | Number:   | 30          |         |                   |

*Root CAT*

| Source          | DF        | Anova SS  | Mean Square | F value | Pr>F <sub>c</sub> |
|-----------------|-----------|-----------|-------------|---------|-------------------|
| Calcium         | 1         | 1.761763  | 1.761763    | 6.527   | 0.0174            |
| Copper          | 2         | 31.013460 | 15.506730   | 57.446  | 0.0000            |
| Ca*Cu           | 2         | 6.773087  | 3.386543    | 12.546  | 0.0002            |
| error           | 24        | 6.478440  | 0.269935    |         |                   |
| Corrected total | 29        | 46.026750 |             |         |                   |
| Coeff Var (%) = | 18.13     |           |             |         |                   |
| Mean:           | 2.8650000 | Number:   | 30          |         |                   |

*Leaf APX*

| Source          | DF         | Anova SS   | Mean Square | F value | Pr>F <sub>c</sub> |
|-----------------|------------|------------|-------------|---------|-------------------|
| Calcium         | 1          | 18.738803  | 18.738803   | 4.307   | 0.0488            |
| Copper          | 2          | 172.480047 | 86.240023   | 19.820  | 0.0000            |
| Ca*Cu           | 2          | 136.391607 | 68.195803   | 15.673  | 0.0000            |
| erro            | 24         | 104.427480 | 4.351145    |         |                   |
| Corrected total | 29         | 432.037937 |             |         |                   |
| Coeff Var (%) = | 19.94      |            |             |         |                   |
| Mean:           | 11.0143333 | Number:    | 30          |         |                   |

*Root APX*

| Source          | DF         | Anova SS    | Mean Square | F value | Pr>F <sub>c</sub> |
|-----------------|------------|-------------|-------------|---------|-------------------|
| Calcium         | 1          | 296.479203  | 296.479203  | 18.022  | 0.0003            |
| Copper          | 2          | 288.698807  | 144.349403  | 8.775   | 0.0014            |
| Ca*Cu           | 2          | 1565.071047 | 782.535523  | 47.568  | 0.0000            |
| error           | 24         | 394.819240  | 16.450802   |         |                   |
| Corrected total | 29         | 2545.068297 |             |         |                   |
| Coeff Var (%) = | 25.23      |             |             |         |                   |
| Mean:           | 16.0736667 | Number:     | 30          |         |                   |



*Leaf POX*

| Source          | DF         | Anova SS   | Mean Square | F value | Pr>Fc  |
|-----------------|------------|------------|-------------|---------|--------|
| Calcium         | 1          | 25.208333  | 25.208333   | 3.561   | 0.0713 |
| Copper          | 2          | 274.272000 | 137.136000  | 19.372  | 0.0000 |
| Ca*Cu           | 2          | 264.962667 | 132.481333  | 18.714  | 0.0000 |
| error           | 24         | 169.900000 | 7.079167    |         |        |
| Corrected total | 29         | 734.343000 |             |         |        |
| Coeff Var (%) = | 18.70      |            |             |         |        |
| Mean:           | 14.2300000 | Number:    | 30          |         |        |

*Root POX*

| Source          | DF         | Anova SS    | Mean Square | F value | Pr>Fc  |
|-----------------|------------|-------------|-------------|---------|--------|
| Calcium         | 1          | 50.440333   | 50.440333   | 0.998   | 0.3277 |
| Copper          | 2          | 520.088000  | 260.044000  | 5.146   | 0.0138 |
| Ca*Cu           | 2          | 110.378667  | 55.189333   | 1.092   | 0.3516 |
| error           | 24         | 1212.880000 | 50.536667   |         |        |
| Corrected total | 29         | 1893.787000 |             |         |        |
| Coeff Var (%) = | 41.55      |             |             |         |        |
| Mean:           | 17.1100000 | Number:     | 30          |         |        |

**Table S17.** Anova for nitrogen (N) and calcium (Ca) concentrations data in Swingle citrumelo seedlings grown in nutrient solution with different levels of N (Experiment 1) or Ca (Experiment 2), and followed by 15 days in various copper (Cu) concentrations.

*Shoot N*

| Source          | DF         | Anova SS  | Mean Square | F value | Pr>Fc  |
|-----------------|------------|-----------|-------------|---------|--------|
| Calcium         | 1          | 1.008333  | 1.008333    | 0.355   | 0.5571 |
| Copper          | 2          | 12.128000 | 6.064000    | 2.132   | 0.1405 |
| Ca*Cu           | 2          | 5.266667  | 2.633333    | 0.926   | 0.4098 |
| error           | 24         | 68.252000 | 2.843833    |         |        |
| Corrected total | 29         | 86.655000 |             |         |        |
| Coeff Var (%) = | 9.55       |           |             |         |        |
| Mean:           | 17.6500000 | Number:   | 30          |         |        |

*Root N*

| Source          | DF         | Anova SS   | Mean Square | F value | Pr>Fc  |
|-----------------|------------|------------|-------------|---------|--------|
| Calcium         | 1          | 20.667000  | 20.667000   | 2.155   | 0.1551 |
| Copper          | 2          | 15.028667  | 7.514333    | 0.783   | 0.4682 |
| Ca*Cu           | 2          | 12.978000  | 6.489000    | 0.676   | 0.5178 |
| error           | 24         | 230.216000 | 9.592333    |         |        |
| Corrected total | 29         | 278.889667 |             |         |        |
| Coeff Var (%) = | 12.76      |            |             |         |        |
| Mean:           | 24.2633333 | Number:    | 30          |         |        |

*Shoot Ca*

| Source          | DF         | Anova SS   | Mean Square | F value | Pr>Fc  |
|-----------------|------------|------------|-------------|---------|--------|
| Calcium         | 1          | 77.763000  | 77.763000   | 39.284  | 0.0000 |
| Copper          | 2          | 4.932667   | 2.466333    | 1.246   | 0.3056 |
| Ca*Cu           | 2          | 12.566000  | 6.283000    | 3.174   | 0.0598 |
| error           | 24         | 47.508000  | 1.979500    |         |        |
| Corrected total | 29         | 142.769667 |             |         |        |
| Coeff Var (%) = | 11.79      |            |             |         |        |
| Mean:           | 11.9366667 | Number:    | 30          |         |        |

*Root Ca*

| Source          | DF        | Anova SS  | Mean Square | F value | Pr>Fc  |
|-----------------|-----------|-----------|-------------|---------|--------|
| Calcium         | 1         | 70.533333 | 70.533333   | 297.609 | 0.0000 |
| Copper          | 2         | 0.044667  | 0.022333    | 0.094   | 0.9104 |
| Ca*Cu           | 2         | 0.588667  | 0.294333    | 1.242   | 0.3067 |
| error           | 24        | 5.688000  | 0.237000    |         |        |
| Corrected total | 29        | 76.854667 |             |         |        |
| Coeff Var (%) = | 6.75      |           |             |         |        |
| Mean:           | 7.2133333 | Number:   | 30          |         |        |
